# Supplementary material for: Arginase Therapy Combines Effectively with Immune Checkpoint Blockade or Agonist Anti-OX40 Immunotherapy to Control Tumor Growth
Source: Oxford University Press journal article supplement (doi:10.1158/2326-6066.cir-20-0317), 2021-01-26
Supplement: 23266066cir200317-sup-241795_2_supp_6738220_qk3pqs.xlsx [file 23266066cir200317-sup-241795_2_supp_6738220_qk3pqs.xlsx]

## Sheet: Sheet1
Metabolite name	Pool	Molecular weight	Manufacturer	Part#	Molecular weight of chemical standard	Exact concentration of metabolite in the ~5mM standard solution	HMDB link	Polarity for detection	neg m/z	pos m/z	Retention time (min.)	Limit of detection
Alanine	1	89.09	Sigma	A7469	89.09	4.99733	http://www.hmdb.ca/metabolites/HMDB0000161	pos	88.0404	90.055	9.22	300nm
Arginine	1	174.2	Sigma	A6969	210.66	4.99733	http://www.hmdb.ca/metabolites/HMDB0000517	pos		175.119	13.94	100nM
Asparagine	1	132.12	Sigma	A7094	150.13	4.99733	http://www.hmdb.ca/metabolites/HMDB0000168	pos	131.046	133.061	9.69	100nM
Aspartate	1	133.11	Sigma	A7219	133.11	4.99733	http://www.hmdb.ca/metabolites/HMDB0000191	neg	132.03	134.045	10.41	100nM
Citrulline	1	175.2	Sigma	C7629	175.2	4.99733	http://www.hmdb.ca/metabolites/HMDB0000904	pos	174.088	176.103	10.23	100nM
Cystine	1	240.3	Sigma	C7602	240.3	4.99733	http://www.hmdb.ca/metabolites/HMDB0000192	pos	239.017	241.031	10.96	1µM
Glutamate	1	147.13	Sigma	G8415	147.13	4.99733	http://www.hmdb.ca/metabolites/HMDB0000148	neg	146.046	148.06	10.29	100nM
Glutamine	1	146.14	Sigma	G3126	146.14	4.99733	http://www.hmdb.ca/metabolites/HMDB0000641	pos	145.062	147.076	9.6	100nM
Glycine	1	75.066	Sigma	G7126	75.066	4.99733	http://www.hmdb.ca/metabolites/HMDB0000123	pos	74.0248	76.0393	10.53	1µM
Histidine	1	155.155	Sigma	53319	155.155	4.99733	http://www.hmdb.ca/metabolites/HMDB0000177	pos	154.062	156.077	9.31	100nM
Isoleucine	1	131.173	Sigma	I7403	131.173	4.99733	http://www.hmdb.ca/metabolites/HMDB0000172	pos	130.087	132.102	6.08	100nM
Leucine	1	131.17	Sigma	L8912	131.173	4.99733	http://www.hmdb.ca/metabolites/HMDB0000687	pos	130.087	132.102	5.68	300nm
Lysine	1	146.19	Sigma	L8662	182.65	4.99733	http://www.hmdb.ca/metabolites/HMDB0000182	pos	145.098	147.113	13.43	300nm
Methionine	1	149.21	Sigma	M5308	149.21	4.99733	http://www.hmdb.ca/metabolites/HMDB0000696	pos	148.044	150.058	6.44	100nM
Ornithine	1	132.16	Sigma	75469	168.62	4.99733	http://www.hmdb.ca/metabolites/HMDB0000214	pos	131.083	133.097	12.47	100nM
Phenylalanine	1	165.19	Sigma	P5482	165.19	4.99733	http://www.hmdb.ca/metabolites/HMDB0000159	pos	164.072	166.086	4.88	100nM
Proline	1	115.13	Sigma	P5607	115.13	4.99733	http://www.hmdb.ca/metabolites/HMDB0000162	pos	114.056	116.071	7.66	100nM
Serine	1	105.09	Sigma	S4311	105.09	4.99733	http://www.hmdb.ca/metabolites/HMDB0000187	neg	104.035	106.05	10	1µM
Taurine	1	125.15	Sigma	T0625	125.15	4.99733	http://www.hmdb.ca/metabolites/HMDB0000251	neg	124.007	126.022	9.68	300nm
Threonine	1	119.119	Sigma	T8441	119.119	4.99733	http://www.hmdb.ca/metabolites/HMDB0000167	pos	118.051	120.066	9.06	100nM
Tryptophan	1	204.225	Sigma	T8941	204.225	4.99733	http://www.hmdb.ca/metabolites/HMDB0000929	pos	203.083	205.097	6.5	100nM
Tyrosine	1	181.19	Sigma	T8566	181.19	4.99733	http://www.hmdb.ca/metabolites/HMDB0000158	pos	180.067	182.081	7.81	100nM
Valine	1	117.151	Sigma	V0513	117.151	4.99733	http://www.hmdb.ca/metabolites/HMDB0000883	pos	116.072	118.086	7.29	1µM
Lactate	1	90.09	Sigma	L7022	112.06	4.99733	http://www.hmdb.ca/metabolites/HMDB0000190	neg	89.0244	91.039	5.94	100nM
Glucose	1	180.156	Sigma	G7528	180.156	4.99733	http://www.hmdb.ca/metabolites/HMDB0000122	neg	179.056	181.071	9.33	300nm
Metabolite name	Pool	Molecular weight	Manufacturer	Part#	Molecular weight of chemical standard	Exact concentration of metabolite in the ~5mM standard solution	HMDB link	Polarity for detection	neg m/z	pos m/z	Retention time (min.)	Limit of detection
2-hydroxybutyric acid	2	104.1	Sigma	220116	126.09	5.03371	http://www.hmdb.ca/metabolites/HMDB0000008	neg	103.04	105.055	4.43	100nM
AMP	2	347.221	Sigma	A1752	347.22	5.11476	http://www.hmdb.ca/metabolites/HMDB0000045	neg	346.056	348.07	9.61	100nM
Argininosuccinate	2	290.273	Sigma	A5707-50MG	334.24	5.49828	http://www.hmdb.ca/metabolites/HMDB0000052	neg	289.115	291.13	11.62	100nM
Choline	2	104.171	Sigma	C7017	139.62	5.26064	http://www.hmdb.ca/metabolites/HMDB0000097	pos	102.092	104.107	9.97	100nM
Glucose-1-phosphate	2	260.135	Sigma	G6750	336.32	2.37819	http://www.hmdb.ca/metabolites/HMDB0001586	neg	259.022	261.037	11.11	100nM
Glutathione	2	307.324	Sigma	G4251	307.324	4.83431	http://www.hmdb.ca/metabolites/HMDB0000125	pos	306.077	308.091	10.14	100nM
Metabolite name	Pool	Molecular weight	Manufacturer	Part#	Molecular weight of chemical standard	Exact concentration of metabolite in the ~5mM standard solution	HMDB link	Polarity for detection	neg m/z	pos m/z	Retention time (min.)	Limit of detection
3-hydroxybutyric acid	3	104.105	Sigma	H6501	126.09	6.56064	http://www.hmdb.ca/metabolites/HMDB00357	neg	103.04	105.055	5.51	100nM
Creatinine	3	113.12	Sigma	C4255-10MG	113.12	6.08392	http://www.hmdb.ca/metabolites/HMDB0000562	pos	112.052	114.066	4.75	100nM
gamma-aminobutyric acid	3	103.12	Sigma	A2129-10G	103.12	6.28917	http://www.hmdb.ca/metabolites/HMDB0000112	pos	102.056	104.071	9.86	100nM
Glutathione disulfide	3	612.631	Sigma	G4376	612.631	6.16402	http://www.hmdb.ca/metabolites/HMDB0003337	pos	611.145	613.159	12.38	100nM
Glycerate	3	106.077	Sigma	367494	286.25	6.12355	http://www.hmdb.ca/metabolites/HMDB0000139	neg	105.019	107.034	7.96	100nM
Hypoxanthine	3	136.112	Sigma	H9377	136.112	6.06842	http://www.hmdb.ca/metabolites/HMDB0000157	pos	135.031	137.046	5.52	100nM
NAD+	3	663.43	Sigma	N1511	663.43	6.28488	http://www.hmdb.ca/metabolites/HMDB0000902	pos	662.102	664.116	9.66	100nM
Phosphocholine	3	184.152	Sigma	P0378-5G	329.73	6.65385	http://www.hmdb.ca/metabolites/HMDB0001565	pos	182.059	184.073	10.19	100nM
UDP	3	404.161	Sigma	94330-100MG	448.12	3.11618	http://www.hmdb.ca/metabolites/HMDB0000295	pos	402.995	405.01	11.54	1µM
UDP-glucose	3	566.302	Sigma	U4625-100MG	610.27	4.30509	http://www.hmdb.ca/metabolites/HMDB00286	neg	565.048	567.062		100nM
Metabolite name	Pool	Molecular weight	Manufacturer	Part#	Molecular weight of chemical standard	Exact concentration of metabolite in the ~5mM standard solution	HMDB link	Polarity for detection	neg m/z	pos m/z	Retention time (min.)	Limit of detection
Acetylglutamate	4	189.166	Sigma	855642	189.166	6.2721	http://www.hmdb.ca/metabolites/HMDB0001138	pos	188.056	190.071	9.94	100nM
ATP	4	507.18	Sigma	A2383	551.14	5.17765	http://www.hmdb.ca/metabolites/HMDB0000538	neg	505.988	508.003	11.18	1µM
Methionine sulfoxide	4	165.21	Sigma	M1126-1G	165.21	4.15515	http://www.hmdb.ca/metabolites/HMDB0002005	pos	164.039	166.053	8.44	100nM
Methylthioadenosine	4	297.334	Sigma	D5011-25MG	297.334	5.00481	http://www.hmdb.ca/metabolites/HMDB0001173	neg	296.082	298.096	3.16	100nM
SAH	4	384.4	Sigma	A9384-25MG	384.41	4.42773	http://www.hmdb.ca/metabolites/HMDB0000939	pos	383.114	385.129	8.27	100nM
Trimethyllysine	4	189.279	Sigma	T1660-25MG	224.73	4.35056	http://www.hmdb.ca/metabolites/HMDB0001325	neg	229.012	231.026	11.06	100nM
Uridine	4	244.201	Sigma	U3003	244.201	4.77642	http://www.hmdb.ca/metabolites/HMDB0000296	neg	243.062	245.077	5.12	100nM
UTP	4	484.141	Sigma	U6625	559.09	5.68473	http://www.hmdb.ca/metabolites/HMDB0000285	neg	482.961	484.975	12.22	1µM
Metabolite name	Pool	Molecular weight	Manufacturer	Part#	Molecular weight of chemical standard	Exact concentration of metabolite in the ~5mM standard solution	HMDB link	Polarity for detection	neg m/z	pos m/z	Retention time (min.)	Limit of detection
cis-aconitic acid	5	174.108	Sigma	A3412-1G	174.108	5.80174	http://www.hmdb.ca/metabolites/HMDB0000072	neg	173.009	175.024	12.63	100nM
Citrate	5	192.124	Mallinckrodt	754	294.1	5.90142	http://www.hmdb.ca/metabolites/HMDB0000094	neg	191.02	193.034	12.73	100nM
Glucose-6-phosphate	5	260.135	Sigma	G7879	282.12	5.57512	http://www.hmdb.ca/metabolites/HMDB0001401	neg	259.022	261.037	11.73	100nM
Kynurenine	5	208.214	Sigma	K8625	208.21	5.50672	http://www.hmdb.ca/metabolites/HMDB0000684	pos	207.077	209.092	5.66	100nM
Malate	5	134.087	Sigma	2288	134.087	5.76599	http://www.hmdb.ca/metabolites/HMDB0000744	neg	133.014	135.029	11.24	100nM
Niacinamide	5	122.12	Sigma	72340	122.12	5.77526	http://www.hmdb.ca/metabolites/HMDB0001406	pos	121.041	123.055	3.26	100nM
2-oxoglutarate	5	146.11	Sigma	75890-25G	146.11	5.4702	http://www.hmdb.ca/metabolites/HMDB0062781	neg	145.014	147.029	10.92	100nM
Pyruvate	5	88.06	Sigma	P5280	110.04	4.8745	http://www.hmdb.ca/metabolites/HMDB0000243	both	87.0084	89.0233	4.62	100nM
Succinate	5	118.09	Sigma	S3674	118.09	5.48603	http://www.hmdb.ca/metabolites/HMDB0000254	neg	117.019	119.034	10.7	100nM
Metabolite name	Pool	Molecular weight	Manufacturer	Part#	Molecular weight of chemical standard	Exact concentration of metabolite in the ~5mM standard solution	HMDB link	Polarity for detection	neg m/z	pos m/z	Retention time (min.)	Limit of detection
2-hydroxyglutarate	6	148.114	Sigma	H8378	192.1	6.5758	http://www.hmdb.ca/metabolites/HMDB0059655	neg	147.03	149.044	10.7	100nM
Aminoadipate	6	161.156	Sigma	A0637	161.156	6.26147	http://www.hmdb.ca/metabolites/HMDB00510	both	160.061	162.076	10.4	100nM
Cystathionine	6	222.263	Cayman	16061-50mg	222.263	6.4737	http://www.hmdb.ca/metabolites/HMDB0000099	both	221.06	223.075	11.2	100nM
Glycerophosphocholine	6	258.231	Sigma	G5291-50MG	257.22	6.68363	http://www.hmdb.ca/metabolites/HMDB0000086	pos	256.096	258.11	9.18	100nM
Orotate	6	156.1	Sigma	O2875	194.19	6.37031	http://www.hmdb.ca/metabolites/HMDB0000226	neg	155.01	157.024	6.77	100nM
Pantothenate	6	219.23	Sigma	P5155	238.27	6.16428	http://www.hmdb.ca/metabolites/HMDB0000210	both	218.103	220.118	4.83	100nM
UDP-GlcNAc	6	607.354	Sigma	U4375	651.32	1.56075	http://www.hmdb.ca/metabolites/HMDB0000290	both	606.074	608.089	10.71	100nM
Metabolite name	Pool	Molecular weight	Manufacturer	Part#	Molecular weight of chemical standard	Exact concentration of metabolite in the ~5mM standard solution	HMDB link	Polarity for detection	neg m/z	pos m/z	Retention time (min.)	Limit of detection
N6-acetyllysine	7	188.224	Sigma	A4021-1G	188.22	4.88068	http://www.hmdb.ca/metabolites/HMDB0000206	pos	187.109	189.123	7.72	100nM
Pipecolate	7	129.157	Sigma	P45850-25G	129.16	5.19602	http://www.hmdb.ca/metabolites/HMDB0000070	pos	128.072	130.086	7.21	100nM
3-methyl-2-oxobutyrate	7	116.115	Sigma	198994-5G	138.1	5.38627	http://www.hmdb.ca/metabolites/HMDB0000019	neg	115.04	117.055	3.17	100nM
3-methyl-2-oxopentanoic acid	7	130.142	Sigma	198978-5G	152.12	4.94018	http://www.hmdb.ca/metabolites/HMDB0000491	neg	129.056	131.07	2.66	100nM
gamma-glutamyl-alanine	7	217.222	Sigma	483834-500MG	218.21	4.76537	http://www.hmdb.ca/metabolites/HMDB0029142	pos	217.082	219.098	10.05	100nM
